# Supplementary material for: The Effect of Organic and Conventional Cultivations on Antioxidants Content in Blackcurrant (Ribes nigrum L.) Species
Source: MDPI journal article supplement (doi:10.3390/app11115113), 2021-05-31
Supplement: s1 [file s1]

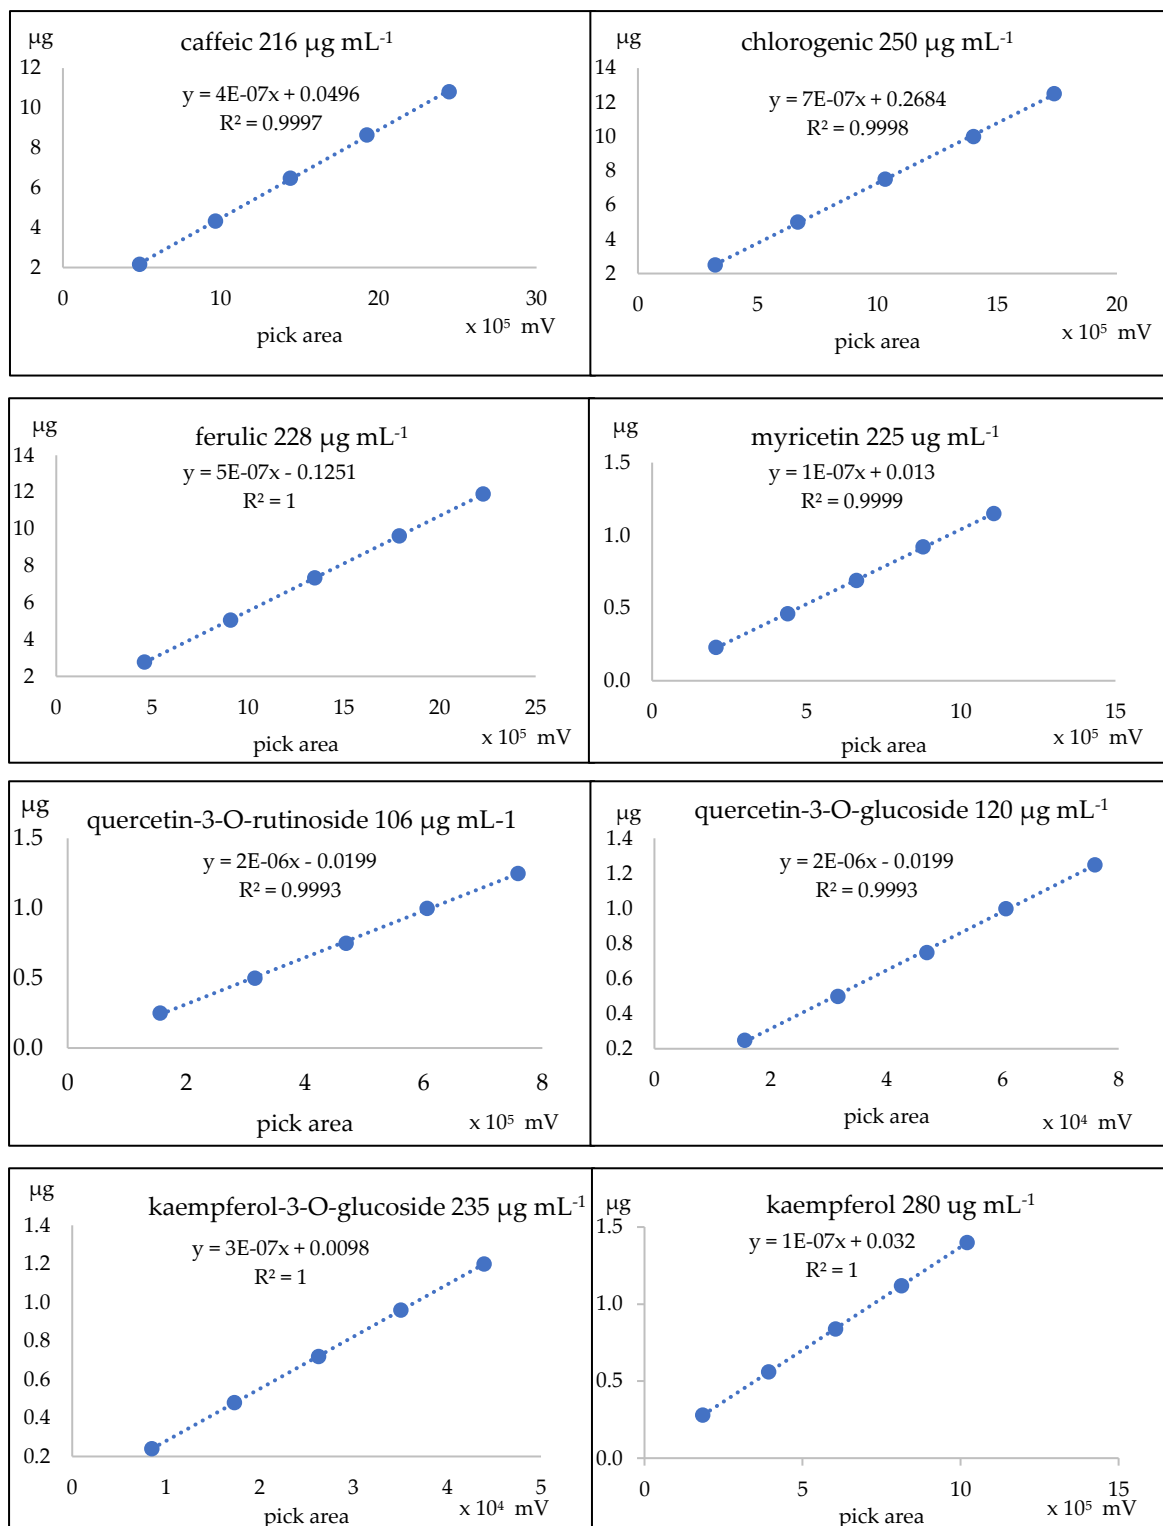

Figure S3A. Standard curves for all polyphenols identified in experiment in blackcurrant experiment

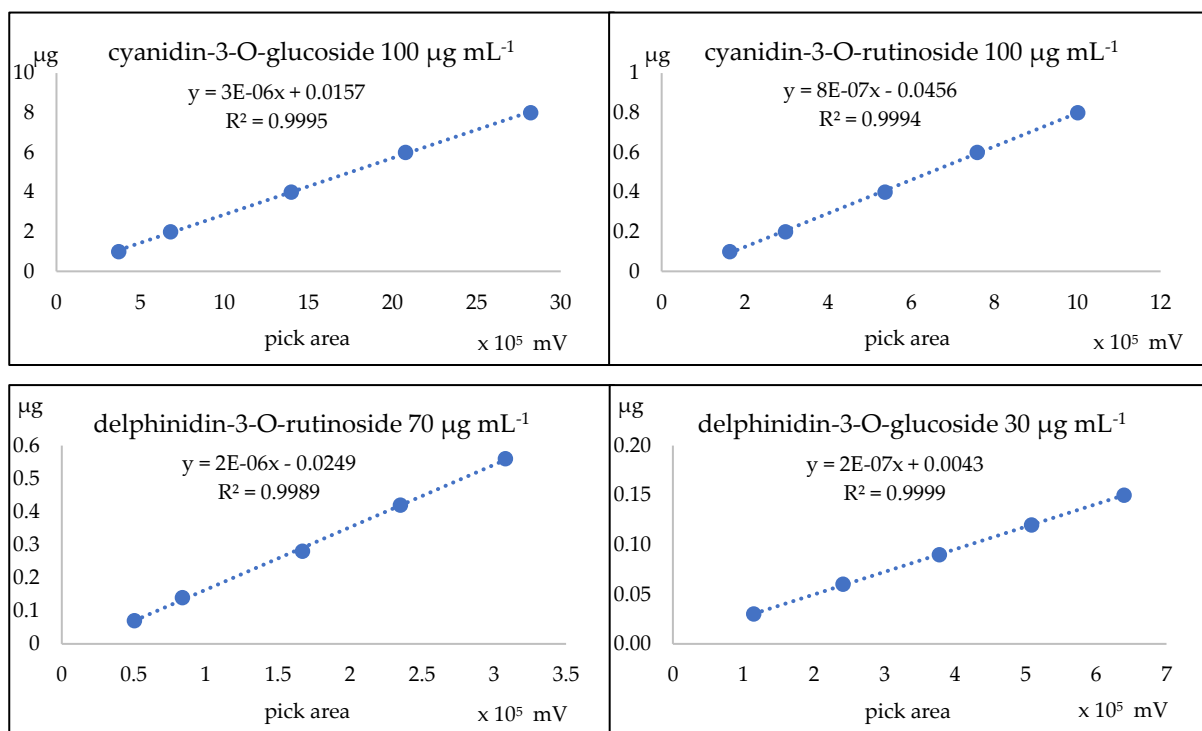

Figure S3A. Standard curves for all anthocyanins identified in experiment in blackcurrant experiment
